# Supplementary material for: Facile preparation of stable aqueous titania sols for fabrication of highly active TiO2 photocatalyst films
Source: Royal Society of Chemistry journal article supplement (doi:10.1039/c4ta04680c), 2014-11-19
Supplement: c4ta04680c1.pdf [file c4ta04680c1.pdf]

*Supporting Information*

**Facile preparation of stable aqueous titania sols for fabrication of highly active TiO<sub>2</sub> photocatalyst films**

Sayuri Okunaka <sup>a,b</sup>, Hiromasa Tokudome <sup>a\*</sup>, Yutaka Hitomi <sup>c</sup> and Ryu Abe <sup>b\*</sup>

<sup>a</sup> Research Institute, TOTO LTD., 2-8-1 Honson, Chigasaki-City, Kanagawa-pref. 253-8577, Japan.

<sup>b</sup> Department of Energy and Hydrocarbon Chemistry, Graduate School of Engineering, Kyoto University, Katsura Nishikyo-ku, Kyoto 615-8510, Japan.

<sup>c</sup> Department of Molecular Chemistry and Biochemistry, Faculty of Science and Engineering, Doshisha University, 1-3 Tatara Miyakodani, Kyotanabe, Kyoto 610-0321, Japan.

To whom corresponding author should be addressed.

Tel: +81-75-383-2478; Fax: +81-75-383-2478; E-mail: ryu-abe@scl.kyoto-u.ac.jp

**1. Experimental**

a) Measurements of <sup>13</sup>C NMR spectra

<sup>13</sup>C NMR spectrum was recorded on a JMN-ECA 500 spectrometer (JEOL). For <sup>13</sup>C NMR spectrum measurements, CDCl<sub>3</sub> was used for an external referencing (77.23 ppm) and locking. For comparison, <sup>13</sup>C NMR spectra of aqueous solutions of AcOH (0.40 mol/L), acac (0.40 mol/L), and 2-propanol (1.6 mol/L) were also measured.

b) Measurements of Raman spectra

The Raman spectra were recorded with laser Raman spectrometer (Jasco, NRS-7200); an argon ion laser at 532 nm was used.

c) Measurements of TG-DTA

Thermal analysis (TG-DTA) was conducted on dried powders on a TG-8120 (Rigaku). TG-DTA curves were recorded under air flow in the temperature range from 25 to 900°C.

## 2. Results

Table S1.  $^{13}\text{C}$  NMR chemical shifts of AA-sols and authentic samples

| Species                                   | $\text{TiO}_2$ sol [ppm]                                                                   | authentic sample [ppm]                                         |
|-------------------------------------------|--------------------------------------------------------------------------------------------|----------------------------------------------------------------|
| AcOH                                      | 21.1 ( $\text{CH}_3$ )<br>177.3 (CO)                                                       | 20.8 ( $\text{CH}_3$ )<br>177.1 (CO)                           |
| acac (keto-form)                          | 30.9 ( $\text{CH}_3$ )<br>57.5 ( $\text{CH}_2$ )<br>208.9 (CO)                             | 30.8 ( $\text{CH}_3$ )<br>57.5 ( $\text{CH}_2$ )<br>208.9 (CO) |
| acac (enol-form)                          | 24.5 ( $\text{CH}_3$ )<br>101.4 (CH)<br>193.5 (CO)                                         | 24.4 ( $\text{CH}_3$ )<br>101.2 (CH)<br>193.4 (CO)             |
| 2-propanol                                | 24.3 ( $\text{CH}_3$ )<br>64.7 (CH)                                                        | 24.1 ( $\text{CH}_3$ )<br>64.7 (CH)                            |
| Ti-acac complex (depicted in Figure 5(b)) | 194.6 (CO)<br>187.8 (CO)<br>104.9 (CH)<br>26.7 ( $\text{CH}_3$ )<br>25.4 ( $\text{CH}_3$ ) | —                                                              |

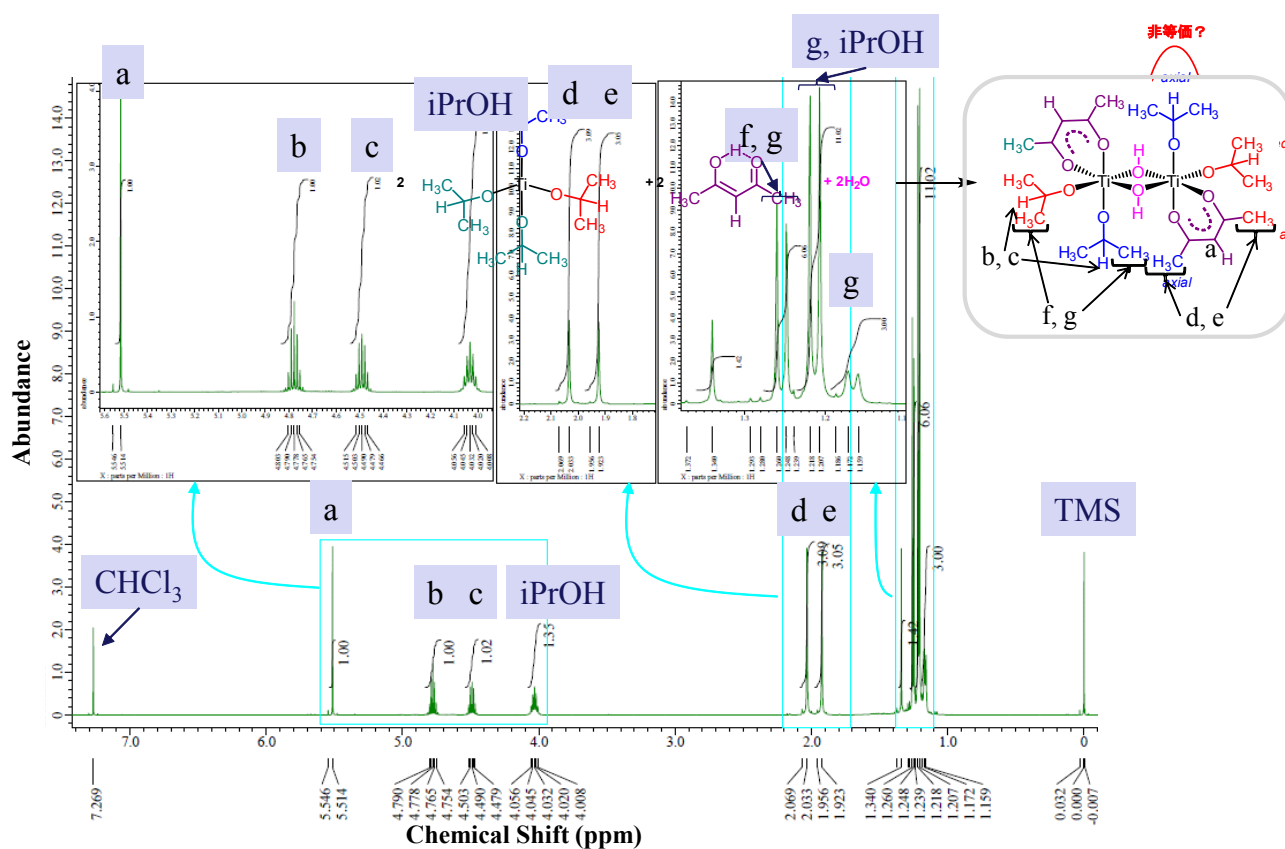

Fig. S1.  $^1\text{H}$  NMR spectrum of a Ti-acac complex in  $\text{CDCl}_3$ .

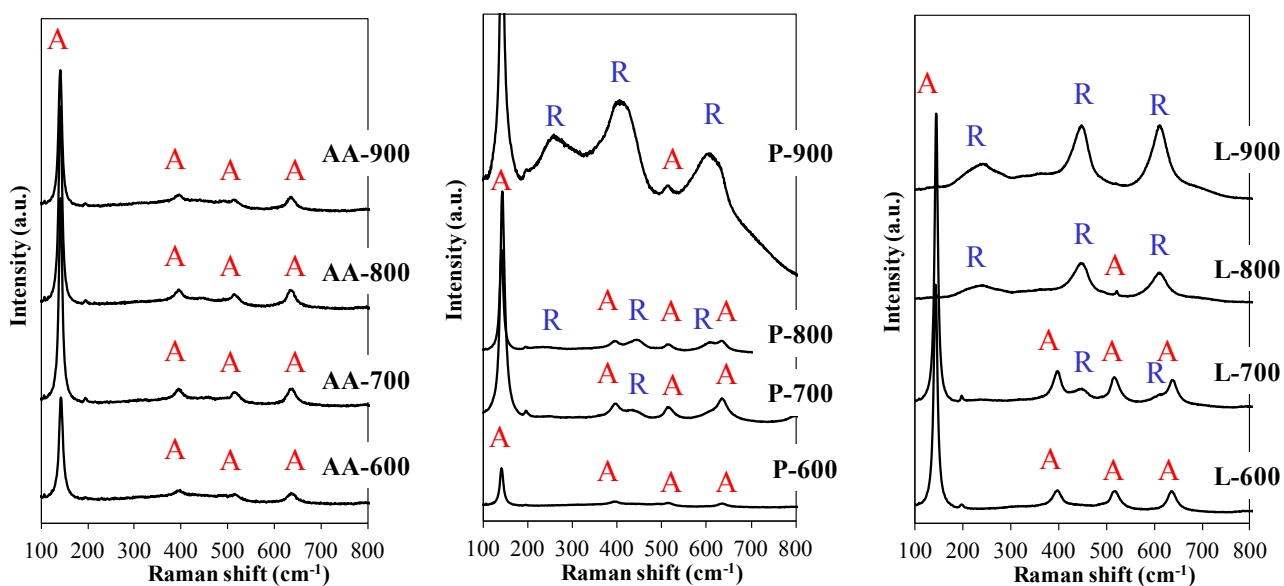

Fig. S2 Raman spectra of TiO<sub>2</sub> films.

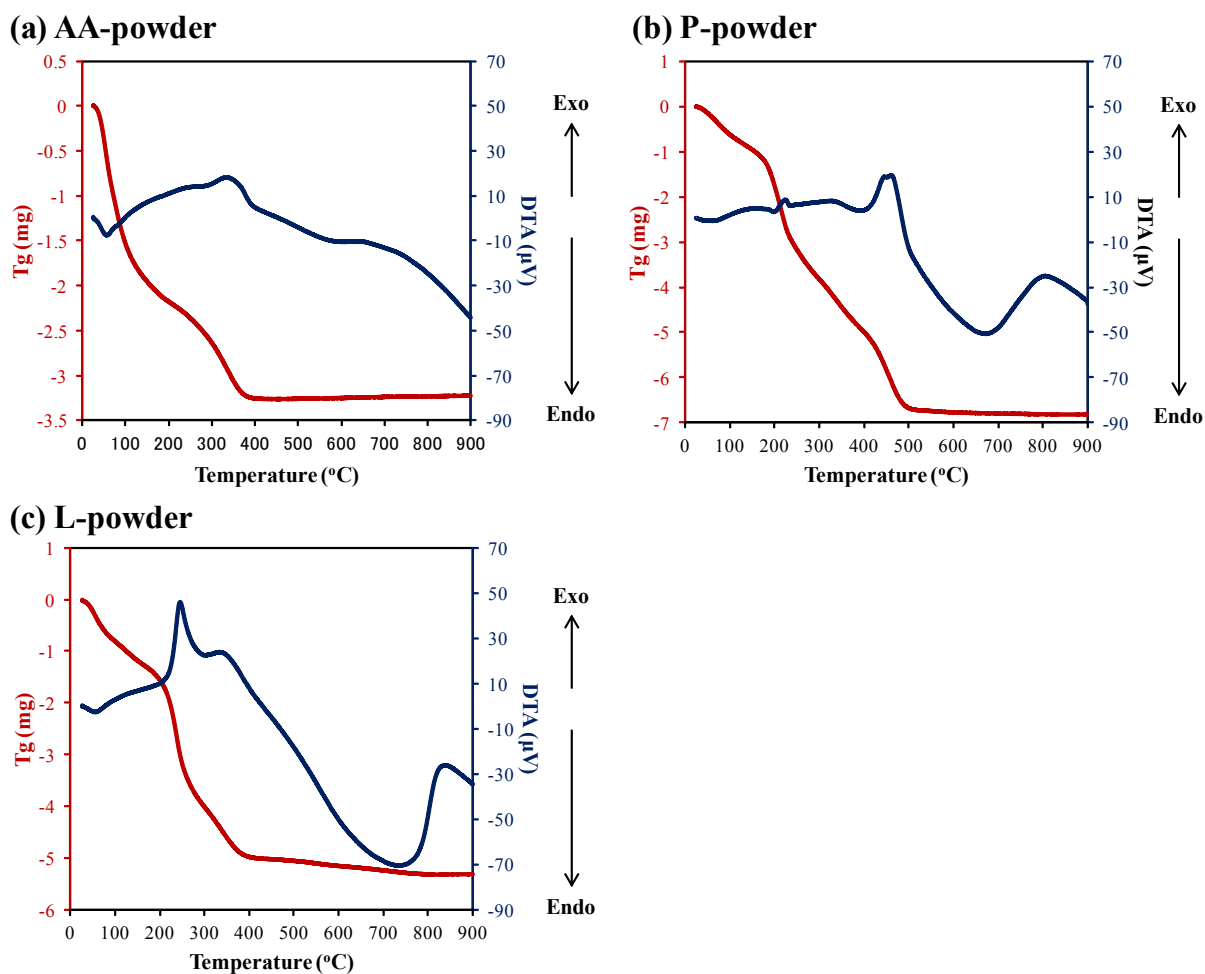

Figure S3. TG-DTA curves of dried powders prepared from sols.

Table S2. Crystalline sizes of TiO<sub>2</sub> films.

|       | AA-films | P-films | L-films |
|-------|----------|---------|---------|
| 600°C | 23.7     | 32.0    | 25.0    |
| 700°C | 31.2     | 35.2    | 37.3    |
| 800°C | 35.7     | 36.7    | 40.3    |
| 900°C | 33.2     | 36.4    | 46.2    |

a) Calculated from the FWHM of the (101) peak by the Scherrer formula.

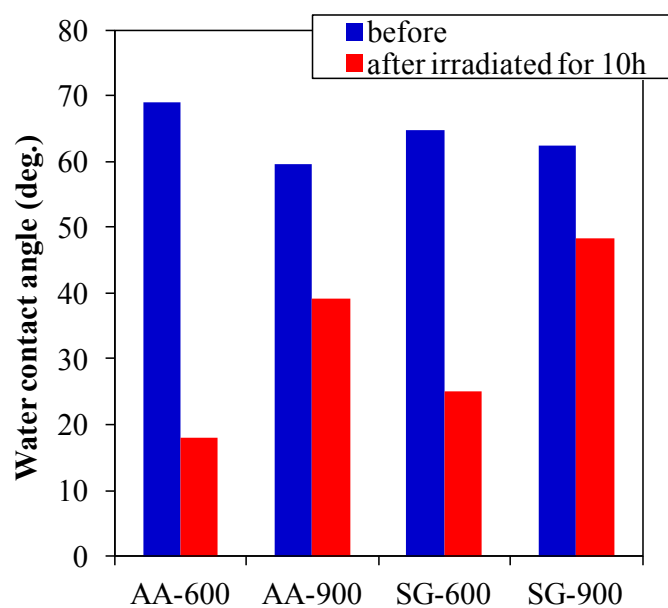

Figure S4. The CA value of AA- and SG-films calcined at 600 and 900°C before and after UV irradiation for 10 hours.
